# Supplementary material
Source: PubMed Central journal article supplement (PMC10102226)
Supplement: mmc1.pdf [file mmc1.pdf]

## Allergen Epidemiology Questionnaire for Allergic Diseases in China

1. Patient name:

\_\_\_\_\_

Clinic number:

\_\_\_\_\_

Telephone:

\_\_\_\_\_

2. Age: \_\_\_\_\_ (year)

3. Sex:

male  female

4. Ethnic:

Han  Uighur  Tibetan  Hui  other \_\_\_\_\_

5. Place of residence

\_\_\_\_\_ province \_\_\_\_\_ city \_\_\_\_\_ district

6. Birth mode:

vaginal  caesarean section

7. Does anyone in your home smoke?

yes  no

8. Has your father ever suffered from the following diseases? (multiple choice)

allergic rhinitis  bronchial asthma  eye allergies  food allergy  
 allergic dermatitis  none  other \_\_\_\_\_

9. Has your mother ever suffered from the following diseases? (multiple choice)

allergic rhinitis  bronchial asthma  eye allergies  food allergy  
 allergic dermatitis  none  other \_\_\_\_\_

10. Have you ever experienced an itchy, stuffy or sneezing nose due to contact with grass, trees or flowers?

yes  no

11. Rhinitis Control Score

• Has your allergic rhinitis affected your work/study or recreational/social activities in the past two weeks?

always  very  often  rarely  never

- Has your allergic rhinitis bothered you in the past two weeks?  
 always  very  often  rarely  never
- Has your allergic rhinitis affected your sleep in the past two weeks?  
 always  very  often  rarely  never
- In the past two weeks, have you needed any other treatment than your doctor prescribed for your allergic rhinitis?  
  $\geq 4$  times / week  2-3 times / week  1 times / week  total 1-2 times  never
- How have you evaluated your allergic rhinitis in the past two weeks?  
 no control at all  slight control  partial control  good control  full control

rhinitis control total score (25): \_\_\_\_

(fill in the total score of the above five questions)

12. Have you ever had trouble in breathing, wheezing, nighttime chest tightness, shortness of breath, or coughing from touching grass, trees, or flowers?

yes  no

### 13. Asthma Control Score

- How often did asthma prevent you from carrying out your daily activities at work, school or at home during in the past 4 weeks?  
 always  very  often  rarely  never
- How many times have you had difficulty in breathing in the past 4 weeks?  
  $>1$  time / day  1 time / day  3- 6 times / week  1 to 2 times / week  never
- In the past 4 weeks, how many times have you woken up at night or earlier than usual because of asthma symptoms (wheezing, coughing, difficulty breathing, chest tightness or pain)?  
  $\geq 4$  nights / week  2 to 3 nights / week  1 time / week  1 to 2 times / month  never
- In the past 4 weeks, how many times have you used rescue medication (such as albuterol)?  
  $\geq 3$  times / day  1-2 times / day  2-3 times / week   $\leq 1$  time/week  never
- How have you evaluated your asthma in the past 4 weeks?  
 no control at all  slight control  partial control  good control  full control

asthma control total score (25): \_\_\_\_

(fill in the total score of the above five questions)

14. When was the house you live in now built?

\_\_\_\_\_

Version number: V3.1; May 16, 2019

Hospital: \_\_\_\_\_ Patient's diagnosis (tick):  asthma  allergic rhinitis  asthma and allergic rhinitis Number: \_\_\_\_\_

15. What does the house you live in look like?

less high residence (<9 floor)       mid-high-rise residence ( $\geq 9$  floor)

16. What region have you lived in?

urban area       rural area

17. Do you often see cockroaches in your home (see cockroach activity every month)?

yes     no

18. Do you have air conditioning in your home?

yes     no

19. What is your living room floor material?

tile or cement     wood material     composite material     carpet

20. What is your pillow material?

synthetic materials     cotton     sponge     plant     feather

21. What is your quilt material?

synthetic materials     cotton     blanket     other material
