# Supplementary material
Source: PubMed Central journal article supplement (PMC10102226)
Supplement: mmc2.pdf [file mmc2.pdf]

**Table S1. Factors associated with pollen allergy among allergy rhinitis of children in mainland China**

| Predictors                        | Frequency   | Bivariate         |                 | Multivariable     |                 |
|-----------------------------------|-------------|-------------------|-----------------|-------------------|-----------------|
|                                   | N (%)       | OR (95% CI)       | <i>P</i> -value | aOR (95% CI)      | <i>P</i> -value |
| <b>Region</b>                     |             |                   |                 |                   |                 |
| East                              | 193 (26.22) | 1                 |                 |                   |                 |
| West                              | 367 (49.86) | 6.51 (4.39,9.82)  | <0.001          | 4.44 (2.55,7.83)  | <0.001          |
| North                             | 71 (9.65)   | 9.55 (5.19,18.21) | <0.001          | 5.95 (2.95,12.32) | <0.001          |
| South                             | 105 (14.27) | 0.25 (0.10,0.54)  | 0.001           | 0.30 (0.11,0.70)  | 0.009           |
| <b>Age</b>                        |             |                   |                 |                   |                 |
| 0-5                               | 222 (30.16) | 1                 |                 |                   |                 |
| 6-17                              | 514 (69.84) | 1.78 (1.29,2.47)  | <0.001          | 1.95 (1.31,2.90)  | 0.001           |
| <b>Sex</b>                        |             |                   |                 |                   |                 |
| Female                            | 248 (33.70) | 1                 |                 |                   |                 |
| Male                              | 488 (66.30) | 1.13 (0.83,1.53)  | 0.443           |                   |                 |
| <b>Ethnic</b>                     |             |                   |                 |                   |                 |
| Han                               | 677 (91.98) | 1                 |                 |                   |                 |
| other                             | 59 (8.01)   | 4.14 (2.29,7.95)  | <0.001          | 2.23 (1.14,4.62)  | 0.023           |
| <b>Birth mode</b>                 |             |                   |                 |                   |                 |
| Vaginal                           | 412 (55.99) |                   |                 |                   |                 |
| Caesarean section                 | 324 (44.02) | 0.98 (0.73,1.31)  | 0.868           |                   |                 |
| <b>Smoker</b>                     |             |                   |                 |                   |                 |
| Nonsmoker at home                 | 374 (50.82) |                   |                 |                   |                 |
| Smoker at home                    | 362 (49.18) | 1.34 (1.00,1.79)  | 0.050           | 1.13 (0.79,1.61)  | 0.501           |
| <b>Paternal allergy</b>           |             |                   |                 |                   |                 |
| No                                | 448 (60.87) | 1                 |                 |                   |                 |
| Yes                               | 288 (39.13) | 0.88 (0.66,1.19)  | 0.300           |                   |                 |
| <b>Maternal allergy</b>           |             |                   |                 |                   |                 |
| No                                | 467 (63.45) | 1                 |                 |                   |                 |
| Yes                               | 269 (36.55) | 1.08 (0.80,1.46)  | 0.605           |                   |                 |
| <b>History of pollen exposure</b> |             |                   |                 |                   |                 |
| No                                | 529 (71.88) | 1                 |                 |                   |                 |
| Yes                               | 207 (28.13) | 2.54 (1.83,3.55)  | <0.001          | 2.10 (1.41,3.16)  | <0.001          |
| <b>House age</b>                  |             |                   |                 |                   |                 |
| ~2010                             | 408 (55.43) |                   |                 |                   |                 |
| 2011~2015                         | 217 (29.48) | 1.14 (0.82,1.59)  | 0.424           | 1.14 (0.76,1.73)  | 0.521           |
| 2016~2021                         | 111 (15.08) | 1.39 (0.91,2.11)  | 0.128           | 1.16 (0.70,1.95)  | 0.563           |
| <b>Floor</b>                      |             |                   |                 |                   |                 |
| <9                                | 477 (64.81) | 1                 |                 |                   |                 |
| ≥9                                | 259 (35.19) | 0.91 (0.67,1.23)  | 0.540           |                   |                 |
| <b>Living area</b>                |             |                   |                 |                   |                 |
| Rural area                        | 198 (26.90) | 1                 |                 |                   |                 |
| Urban area                        | 538 (73.10) | 1.51 (1.09,2.12)  | 0.014           | 1.31 (0.86, 2.01) | 0.212           |

|                                      |             |                   |        |                  |       |
|--------------------------------------|-------------|-------------------|--------|------------------|-------|
| <b>cockroach</b>                     |             |                   |        |                  |       |
| No                                   | 527 (71.60) | 1                 |        |                  |       |
| Yes                                  | 209 (28.40) | 0.28 (0.20,0.40)  | <0.001 | 0.67 (0.42,1.06) | 0.088 |
| <b>Air conditioner</b>               |             |                   |        |                  |       |
| No                                   | 272 (36.96) | 1                 |        |                  |       |
| Yes                                  | 464 (63.04) | 0.27 (0.20,0.37)  | <0.001 | 0.88 (0.56,1.39) | 0.575 |
| <b>Material of living room floor</b> |             |                   |        |                  |       |
| Tile or cement                       | 524 (71.20) | 1                 |        |                  |       |
| Wood material                        | 113 (15.35) | 1.05 (0.70,1.58)  | 0.803  | 1.14 (0.69,1.88) | 0.603 |
| Composite material                   | 44 (5.98)   | 0.83 (0.44,1.53)  | 0.548  | 0.79 (0.37,1.67) | 0.533 |
| Carpet                               | 55 (7.47)   | 1.54 (0.88,2.72)  | 0.131  | 2.21 (1.12,4.42) | 0.023 |
| <b>Material of pillow</b>            |             |                   |        |                  |       |
| Synthetic materials                  | 275 (37.36) | 1                 |        |                  |       |
| Cotton                               | 124 (16.85) | 1.13 (0.73, 1.73) | 0.588  | 1.58 (0.92,2.73) | 0.101 |
| Sponge                               | 101 (13.72) | 0.52 (0.31, 0.84) | 0.010  | 0.63 (0.34,1.16) | 0.141 |
| Plant                                | 187 (25.41) | 3.39 (2.29, 5.06) | <0.001 | 1.74 (1.06,2.85) | 0.028 |
| Feather                              | 49 (6.66)   | 0.51 (0.25, 0.98) | 0.052  | 0.60 (0.26,1.36) | 0.229 |
| <b>Material of quilt</b>             |             |                   |        |                  |       |
| Synthetic materials                  | 161 (21.88) | 1                 |        |                  |       |
| Cotton                               | 420 (57.07) | 1.09 (0.76, 1.58) | 0.625  | 1.43 (0.88,2.33) | 0.150 |
| Blanket                              | 24 (3.26)   | 0.53 (0.21, 1.28) | 0.171  | 1.67 (0.52,5.17) | 0.380 |
| Other material                       | 131 (17.80) | 0.50 (0.31, 0.81) | 0.005  | 1.31 (0.70,2.47) | 0.403 |

Notes: significant difference of Bivariate regression analysis:  $P < 0.15$

significant difference of multiple regression analysis:  $P < 0.05$ .

OR: odds ratio

aOR: adjusted odds ratio
